# Supplementary material for: Terahertz spectroscopic characterization and DFT calculations of vanillin cocrystals with nicotinamide and isonicotinamide
Source: Royal Society of Chemistry journal article supplement (doi:10.1039/d2ce01642g), 2023-01-01
Supplement: d2ce01642g1.pdf [file d2ce01642g1.pdf]

Table S1. The stiffness matrix of VAN-NIC cocrystal, the unit is GPa.

| Direction | XX     | YY     | ZZ     | XY     | YZ     | ZX     |
|-----------|--------|--------|--------|--------|--------|--------|
| XX        | 21.086 | 9.331  | 8.495  | 2.629  | -1.421 | -2.837 |
| YY        | 9.331  | 14.287 | 10.720 | 1.554  | 2.319  | 0.329  |
| ZZ        | 8.495  | 10.720 | 34.097 | 2.695  | 10.054 | -5.290 |
| XY        | 2.629  | 1.554  | 2.695  | 6.294  | 1.030  | -1.952 |
| YZ        | -1.421 | 2.319  | 10.054 | 1.030  | 8.311  | -0.041 |
| ZX        | -2.837 | 0.329  | -5.290 | -1.952 | -0.041 | 5.846  |

Table S2. The average properties of VAN-NIC cocrystal, the unit is GPa.

| Averaging scheme | Bulk modulus | Young's modulus | Shear modulus | Poisson's ratio |
|------------------|--------------|-----------------|---------------|-----------------|
| Voigt            | 14.062       | 17.609          | 6.819         | 0.2913          |
| Reuss            | 10.924       | 10.464          | 3.903         | 0.3404          |
| Hill             | 12.493       | 14.07           | 5.361         | 0.3123          |

Table S3. The stiffness matrix of VAN-INM cocrystal, the unit is GPa.

| Direction | XX     | YY     | ZZ     | XY     | YZ     | ZX     |
|-----------|--------|--------|--------|--------|--------|--------|
| XX        | 12.366 | 8.029  | 13.608 | -0.823 | -1.244 | 2.780  |
| YY        | 8.029  | 21.540 | 12.977 | -1.408 | -1.265 | 4.460  |
| ZZ        | 13.608 | 12.977 | 32.298 | -2.872 | -4.951 | 13.968 |
| XY        | -0.823 | -1.408 | -2.872 | 4.354  | 5.480  | -2.500 |
| YZ        | -1.244 | -1.265 | -4.951 | 5.480  | 10.030 | -4.208 |
| ZX        | 2.780  | 4.460  | 13.968 | -2.500 | -4.208 | 10.907 |

Table S4. The average properties of VAN-INM cocrystal, the unit is GPa.

| Averaging scheme | Bulk modulus | Young's modulus | Shear modulus | Poisson's ratio |
|------------------|--------------|-----------------|---------------|-----------------|
| Voigt            | 15.048       | 18.549          | 7.164         | 0.2946          |
| Reuss            | 10.137       | 6.095           | 2.177         | 0.3998          |
| Hill             | 12.593       | 12.470          | 4.671         | 0.3350          |
